1 **Title Page**

2 **Title:** Mental Health Outcomes of Foster and Adopted Individuals with Adverse Childhood  
3 Experiences: A Validation of Known Risks Using EHR Data

4 **Authors:** Anita C Randolph, PhD,<sup>1</sup> Evan Dastin-van Rijn, PhD,<sup>1</sup> Shelby Anderson, B.S,<sup>1</sup> Logan  
5 Caola, M.S,<sup>1</sup> Erich Kummerfeld, PhD,<sup>2</sup> Christi Sullivan, MPH,<sup>1</sup> Stefanie Simpson, B.S & B.A,<sup>1</sup>  
6 Aarav Kallar, M.S,<sup>1,2</sup> Ritwick Banerjee, M.S,<sup>1,2</sup> Audrey Houghton, B.A,<sup>1</sup> Mark Fiecas, PhD<sup>3</sup>

7 **Institutional addresses:**

- 8 1. School of Medicine, Department of Psychiatry and Behavioral Sciences, University of  
9 Minnesota, Minneapolis, MN, USA.  
10 2. Institute for Health Informatics, University of Minnesota, MN, USA.  
11 3. School of Public Health, Division of Biostatistics & Health Data Science, University of  
12 Minnesota, Minneapolis, MN, USA.

13 **Corresponding Author:** Audrey Houghton, BA

14 **Corresponding Author Address:**

15 2312 S. 6th St.  
16 Floor 2, Suite F221  
17 Minneapolis, MN 55454

18 **Corresponding Author Email:** [hough129@umn.edu](mailto:hough129@umn.edu)

19 **Corresponding Author Telephone:** +1 (612) 462-1481

20 **Abstract**

21 **Background:** Adverse childhood experiences (ACEs) are traumatic or adverse events in early  
22 life that can have lasting effects on behavioral, emotional, and psychological functioning. Prior  
23 research suggests ACEs relate to later psychiatric outcomes through threshold, cumulative, and

24 individual-specific risk patterns. Few studies, however, have operationalized all three models to  
25 test ACE-specific associations with diagnosed psychiatric disorders in individuals who are  
26 adopted or with foster care histories.

27 **Methods:** We conducted a cross-sectional retrospective study using electronic health record data  
28 from foster care and adopted patients aged 0-21 years old seen at the University of Minnesota  
29 Adoption Medicine Clinic (UMN-AMC) between 2014-2024. Extracted measures included ACE  
30 history, demographics, and psychiatric diagnoses. We used latent class analysis and logistic  
31 regression to identify clusters of adversity and estimate associations with psychiatric diagnosis  
32 domains, adjusting for Sex and Age at Initial Visit.

33 **Results:** ACEs showed a threshold pattern across psychiatric domains, with higher ACE counts  
34 associated with greater odds of psychiatric diagnoses. Individual risk modeling indicated that  
35 exposure to abuse or violence was associated with higher odds of psychiatric diagnoses. Across  
36 cumulative and individual risk approaches, Anxiety Disorders, Mood Disorders, and Behavioral  
37 or Emotional Disorders showed the greatest sensitivity to adversity.

38 **Conclusion:** Current ACE models may not fully capture neurodevelopmental impacts reflected  
39 in diagnosed psychiatric disorders among adolescents, particularly in high-risk groups such as  
40 foster and adopted individuals. In a large clinic sample our findings support a nuanced  
41 association between ACEs and later psychiatric diagnoses and highlight the need for ACE-  
42 focused assessment, prevention, and treatment strategies tailored to foster care and adopted  
43 populations.

44 **Key words:** Adverse Childhood Experiences, Childhood Psychiatric Diagnoses, Electronic  
45 Health Records, Adoption Medicine

46 **Background**

47 In the U.S., two-thirds of adults have experienced at least one adverse childhood experience  
48 (ACE), and one in six have experienced four or more ACEs. Understanding how ACEs impact  
49 future health outcomes is a growing area of research.<sup>1</sup> ACEs are traumatic events occurring  
50 during the first 18 years of a person's life, and include neglect, physical/sexual/emotional abuse,  
51 and household dysfunction like caregiver mental illness or substance use. Risk factors for ACE  
52 exposure include housing instability, community-level adversity (e.g., violence, food insecurity),  
53 and intergenerational trauma.<sup>2</sup> The relationship between ACEs and poor adult mental health  
54 outcomes are well-documented across psychiatric disorders,<sup>3</sup> including evidence that ACE  
55 exposure increases the odds of multiple mood and anxiety disorders.<sup>4,5</sup> ACEs are also associated  
56 with health-harming behaviors in adulthood, underscoring their public health impact.<sup>6</sup>

57  
58 Over the past three decades, several frameworks have been used to characterize ACE-related  
59 risk. Threshold (dose-dependent) models emphasize higher ACE counts as conferring greater  
60 risk of adverse outcomes,<sup>3,7</sup> including markedly elevated prevalence of depression, substance  
61 use, and suicide attempts amongst those with  $\geq 4$  ACEs.<sup>8</sup> Cumulative risk models sum  
62 exposures into a weighted score to identify individuals at highest risk,<sup>9</sup> but often assume equal  
63 weighting and can obscure heterogeneity in co-occurring adversities and ACE-specific drivers  
64 of outcomes.<sup>10</sup> In contrast, individual risk models estimate associations for specific ACE types,  
65 supporting more targeted prevention strategies.<sup>11</sup> For example, sexual abuse, emotional abuse,  
66 and community violence have each been linked to increased risk for clinically confirmed  
67 psychiatric disorders.<sup>12</sup>

68  
69 Clarifying how these risk models operate in high-risk groups such as foster care and adopted

70 individuals is essential for prevention and early intervention. Higher ACE burden in the foster  
71 care system has been associated with poorer permanency outcomes, and foster care-involved  
72 youth have substantially elevated mental health needs relative to peers.<sup>13</sup> We investigated  
73 threshold, cumulative, and individual ACE risk models in relation to psychiatric diagnoses  
74 among foster care and adopted patients receiving care at the University of Minnesota's  
75 Adoption Medicine Clinic (UMN-AMC). We hypothesized that higher ACE exposure would be  
76 associated with increased odds of psychiatric diagnosis, with additional ACE-type specificity  
77 across diagnostic groupings.

## 78 Methods

### 79 *Study Participants*

80 The study population was patients with available ACE and psychiatric diagnoses data via  
81 patient UMN-AMC electronic health records (EHRs). The UMN-AMC serves children who  
82 experience higher rates of early-life adversities than the general population, including children  
83 currently in the foster care system, those recently adopted domestically and internationally, and  
84 adopted children with severe milestone delays and mental health disorders. Because our sample  
85 spans from newborn to 21 years of age, we describe our sample using the word "individual" in  
86 place of words like "children" or "youth" to best represent the age span of our population.

### 87 *Design and data extraction*

88 Data was collected from the EHRs of the UMN-AMC of 3,685 patients ages 0-21 years old who  
89 completed their first Comprehensive Child Wellness Assessments (CCWA) from 2014 through  
90 2024. Five trained Research Professionals extracted ACE data from narrative notes provided by  
91 social workers, child protective services, and relatives during the CCWA visit. Psychiatric  
92 diagnoses were pulled from each patient's EHR by Best Practices Integrated Informatics Core

93 (BPIC) staff. Patients were excluded from analyses if their EHR data were inaccessible or  
94 incomplete (eg, for patients who either did not attend or schedule their follow up appointment(s)  
95 or new to the clinic and had no historic clinical data from 2014-2024). This resulted in a final  
96 analytical sample of  $n = 2720$ .

## 97 **Measures**

### 98 *Adverse Childhood Experiences Questionnaire*

99 The 15-item ACE questionnaire uses expanded definitions based on the Kaiser-CDC 10-item  
100 ACE questionnaire covering abuse (physical, emotional, sexual), neglect (physical, emotional),  
101 and household dysfunction (substance use, mental illness, maternal violence, and criminal  
102 behavior).<sup>9</sup> ACE definitions were further expanded using the PEARLS screener to capture  
103 bullying, neighborhood violence, discrimination, housing instability, and food insecurity. See  
104 Table 1 for collected variables and classification.

105  
106 **Table 1. Definitions and operationalization of ACEs questionnaire**

107  
108

| ACE             | Definition                                                                                                                                                                                                                                            | Operationalization |
|-----------------|-------------------------------------------------------------------------------------------------------------------------------------------------------------------------------------------------------------------------------------------------------|--------------------|
| Emotional abuse | Has a parent/caregiver ever sworn, insulted, humiliated, or put down your child?                                                                                                                                                                      | Yes/no/suspected   |
| Physical abuse  | Has any adult in the household ever pushed, grabbed, slapped, or thrown something at your child, hit your child so hard that your child had marks or was injured, threatened your child in a way that made your child afraid that they might be hurt? | Yes/no/suspected   |
| Sexual abuse    | Has your child ever experienced sexual abuse?                                                                                                                                                                                                         | Yes/no/suspected   |

|                             |                                                                                                                                                                                                                                                                                                                                                |                  |
|-----------------------------|------------------------------------------------------------------------------------------------------------------------------------------------------------------------------------------------------------------------------------------------------------------------------------------------------------------------------------------------|------------------|
|                             | For example, anyone touched your child or asked your child to touch that person in a way that was unwanted, or made your child feel uncomfortable, or anyone ever attempted or actually had oral, anal, or vaginal sex with your child, or allowed to witness adult sexual activity.                                                           |                  |
| Abuse unspecified           | This variable captures any abuse mentioned but not specified as emotional, physical, or sexual within the patient's EHR.                                                                                                                                                                                                                       | Yes/no/suspected |
| Physical neglect            | Has your child ever lacked appropriate care by any caregiver? Examples include not being protected from unsafe situations, not cared for when sick or injured even when the resources were available, not having enough food to eat, forced to wear dirty clothes, caregiver being unable to take child to doctor if needed, and or abandoned. | Yes/no/suspected |
| Neglect unspecified         | This variable captures any neglect mentioned in the EHR not specified as physical neglect. Examples include emotional, educational, and medical neglect.                                                                                                                                                                                       | Yes/no/suspected |
| Caregiver treated violently | Has your child ever seen or heard a parent/caregiver being slapped, kicked, punched, beat up, pushed, bitten, hit with a fist, hit with something hard, threatened, or hurt with a weapon, had something thrown at, sexually assaulted or raped, screamed at, sworn                                                                            | Yes/no/suspected |

|                                  |                                                                                                                                                                                                                                                                                                                                                                                                                                                                                                                                                                                                                                                                  |                                         |
|----------------------------------|------------------------------------------------------------------------------------------------------------------------------------------------------------------------------------------------------------------------------------------------------------------------------------------------------------------------------------------------------------------------------------------------------------------------------------------------------------------------------------------------------------------------------------------------------------------------------------------------------------------------------------------------------------------|-----------------------------------------|
|                                  | at, insulted or humiliated by another adult/household member?                                                                                                                                                                                                                                                                                                                                                                                                                                                                                                                                                                                                    |                                         |
| Family violence                  | Has your child ever seen or heard a non-caregiver being slapped, kicked, punched, beat up, pushed, bitten, hit with a fist, hit with something hard, threatened, hurt with a weapon, had something thrown at them, repeatedly hit over at least a few minutes, screamed at, sworn at, insulted or humiliated, sexually assaulted or raped by another adult/household member?<br>or<br>This includes another category classifying if the violence is perpetrated by the patient. Has your child ever slapped, kicked, punched, beat up, pushed, bitten, hit with a fist, hit with something hard, threatened, or hurt with a weapon a non-caregiver family member | Yes/no/suspected/perpetrated by patient |
| Substance abuse in the household | Has the child's caregiver ever had, or currently has a problem with too much alcohol, street drugs, or prescription medication use?                                                                                                                                                                                                                                                                                                                                                                                                                                                                                                                              | Yes/no/suspected                        |
| Mental Illness in the household  | Has the child ever lived with a parent/caregiver who had mental health issues or attempted suicide?                                                                                                                                                                                                                                                                                                                                                                                                                                                                                                                                                              | Yes/no/suspected                        |
| Incarcerated Household Member    | Has the child ever lived with a parent/caregiver who went to jail/prison?                                                                                                                                                                                                                                                                                                                                                                                                                                                                                                                                                                                        | Yes/no/suspected                        |
| Parental Divorce                 | Have there ever been                                                                                                                                                                                                                                                                                                                                                                                                                                                                                                                                                                                                                                             | Yes/no/suspected                        |

|                                                               |                                                                                                                                                                                                |                                         |
|---------------------------------------------------------------|------------------------------------------------------------------------------------------------------------------------------------------------------------------------------------------------|-----------------------------------------|
|                                                               | significant changes in the relationship status of the child's caregiver?                                                                                                                       |                                         |
| Caregiver Disability                                          | Has the child ever lived with a parent/caregiver who had a serious physical illness or disability (physical, intellectual, learning, developmental, or sensory)?                               | Yes/no/suspected                        |
| Housing Instability                                           | Has the child ever had problems with housing? (for example, being homeless, not having a stable place to live, faced eviction or foreclosure, staying in a shelter, having to move frequently) | Yes/no/suspected                        |
| Community Violence                                            | Has your child ever perpetuated, seen, heard, or been a victim of violence in your neighborhood?                                                                                               | Yes/no/suspected/perpetrated by patient |
| Personal history of being arrested, detained, or incarcerated | Has your child ever been detained, arrested or incarcerated?                                                                                                                                   | Yes/no/suspected                        |
| Personal history of suicidal ideation or attempt              | Has your child ever had personal history of suicidal ideation or attempt?                                                                                                                      | Yes/no/suspected                        |
| Personal history of self injurious behavior                   | Has your child ever had a personal history of self injurious behavior?                                                                                                                         | Yes/no/suspected                        |
| Personal history of substance use                             | Has your child ever had a personal history of substance use?                                                                                                                                   | Yes/no/suspected                        |

109

110 ***Psychiatric disorders***

111 We used ICD-10 diagnostic codes to identify psychiatric diagnoses recorded at visits. ICD-10 is  
 112 the World Health Organization's classification system for health conditions; codes include a  
 113 letter and numbers (e.g., generalized anxiety disorder: F41.1), where the initial letter denotes the

114 diagnostic chapter (F = mental, behavioral, and neurodevelopmental disorders). ICD-10 codes  
115 were extracted from patients' EHRs via the UMN BPIC, which compiled each participant's  
116 medical and psychiatric diagnoses across their record. Because some earlier visits used ICD-9,  
117 both ICD-9 and ICD-10 codes were included in analyses. Diagnostic outcome operationalization  
118 is provided in Table 2.

### 119 **Statistical Analysis**

120 Diagnosis codes were grouped by the first three ICD characters and then collapsed into broader  
121 diagnostic categories (Table 2). Each category served as a binary outcome in logistic regression  
122 (1 = ever diagnosed; 0 = never diagnosed during the observation period). For each outcome, we  
123 fit three models to estimate marginal associations: (1) categorical ACE count (1, 2, 3,  $\geq 4$  vs 0),  
124 (2) cumulative ACE score (capped at 10 to limit influence of rare extremes; less than 2% of the  
125 individuals had more than 10 ACEs.), and (3) univariate associations for individual ACE types or  
126 personal history metrics. All models adjusted for Sex and Age at Initial Visit. P-values were false  
127 discovery rate-controlled at 0.05 using Benjamini–Hochberg. Regression coefficients and 95%  
128 confidence intervals (CIs) were converted to odds ratios (ORs); for cumulative score, ORs are  
129 reported per one SD increase to aid comparability with categorical predictors.

130

Table 2. Mapping of diagnostic categories to ranges of ICD codes

| <b>Diagnosis Category</b>                       | <b>ICD9 Codes</b> | <b>ICD10 Codes</b> |
|-------------------------------------------------|-------------------|--------------------|
| <b>Mood Disorders</b>                           | 311               | F30-F39            |
| <b>Intellectual and Developmental Disorders</b> | 315, 317-319      | F80-F84, F70-F79   |
| <b>Anxiety Disorders</b>                        | 300, 308-309      | F40-F48            |
| <b>Substance Use Disorders</b>                  | 304-305, 291-     | F10-F19            |

|                                                                        |              |         |
|------------------------------------------------------------------------|--------------|---------|
|                                                                        | 292          |         |
| <b>Behavioral and Emotional Disorders</b>                              | 312-314      | F90-F98 |
| <b>Personality Disorders</b>                                           | 301          | F60-F69 |
| <b>Behavioral Syndromes Associated with Physiological Disturbances</b> | 302, 306-307 | F50-F59 |

131

132

### Results

133 Results from descriptive measures are presented in Table 3. Among the mental health diagnoses

134 assessed in the study, the most prevalent were Anxiety Disorders (60.3%) and Intellectual and

135 Developmental Disorders (47.9%), and the least prevalent were Substance Use Disorders (4.9%)

136 and Personality Disorders (3.9%). ACEs were highly prevalent in the dataset, with 80.1% of the

137 individuals having at least one type of adverse experience, and 47.2% having four or more.

138 Among ACEs, substance abuse in the household (49.9%) and mental illness in the household

139 (42.8%) were the most prevalent, while family violence (11.8%) and unspecified types of abuse

140 (5.1%) were the least prevalent. A sizable minority of the individuals also had personal

141 experience with health-harming behaviors, among which personal history of self injurious

142 behavior (18.9%) was the most prevalent while personal history of substance use (2.7%) was the

143 least prevalent.

---

Table 3. Description of study measures (N=2720)

---

| <b>Variable</b> | <b>count (%) or mean [SD]</b> |
|-----------------|-------------------------------|
|-----------------|-------------------------------|

---

#### **Demographics**

|                                          |           |
|------------------------------------------|-----------|
| <b>Age at Initial Visit (range 0-21)</b> | 7.2 [4.4] |
|------------------------------------------|-----------|

**Female** 1290 (47.4)

### **Mental Health Diagnoses**

**Mood Disorders** 421 (15.5)

**Intellectual and Developmental Disorders** 1303 (47.9)

**Anxiety Disorders** 1640 (60.3)

**Substance Use Disorders** 133 (4.9)

**Behavioral and Emotional Disorders** 1266 (46.5)

**Personality Disorders** 105 (3.9)

**Behavioral Syndromes Associated with Physiological Disturbances** 218 (8.0)

### **ACEs**

**Emotional abuse** 661 (24.3)

**Physical abuse** 778 (28.6)

**Sexual abuse** 451 (16.6)

**Abuse unspecified** 139 (5.1)

**Physical neglect** 1100 (40.4)

**Neglect unspecified** 674 (24.8)

**Caregiver treated violently** 795 (29.2)

**Family violence** 322 (11.8)

**Substance abuse in the household** 1356 (49.9)

**Mental illness in the household** 1164 (42.8)

**Incarcerated household member** 451 (16.6)

**Parental divorce separation** 518 (19.0)

|                                          |            |
|------------------------------------------|------------|
| <b>Caregiver disability or death</b>     | 501 (18.4) |
| <b>Housing instability</b>               | 438 (16.1) |
| <b>Community violence</b>                | 456 (16.8) |
| <b>Cumulative ACE score (range 0-10)</b> | 3.9 [3.2]  |

#### **Personal History Data**

|                                                                      |            |
|----------------------------------------------------------------------|------------|
| <b>Personal history of being arrested, detained, or incarcerated</b> | 106 (3.9)  |
| <b>Personal history of suicidal ideation or attempt</b>              | 252 (9.3)  |
| <b>Personal history of self injurious behavior</b>                   | 513 (18.9) |
| <b>Personal history of substance use</b>                             | 73 (2.7)   |
| <b>Personal history of violent behavior</b>                          | 234 (8.6)  |

---

*Note.* ACEs = adverse childhood experiences. SD = Standard deviation.

---

144  
145 Table 4 presents the results from logistic regressions testing relations between categorical ACE  
146 count and neuropsychiatric outcomes. Modeling showed that increasing ACE counts were  
147 associated with increased odds of poor neuropsychiatric outcomes across diagnoses with the  
148 exception of Intellectual and Developmental Disorders. To illustrate, compared to individuals  
149 with no ACEs, the odds of receiving an Anxiety Disorder diagnosis was 0.99 (CI = 0.77-1.28)  
150 with one ACE, 1.60 (CI = 1.18-2.17) with two ACEs, 1.80 (CI = 1.30-2.48) with three ACEs,  
151 and 3.48 (CI = 2.79-4.34) with four or more ACEs. A second set of regression models also  
152 indicated that weighted ACE score was associated with Mood Disorders (OR = 1.26, CI = 1.13-  
153 1.40), Anxiety Disorders (OR = 1.93, CI = 1.76-2.12), Behavioral and Emotional Disorders (OR  
154 = 1.33, CI = 1.23-1.44), Personality Disorders (OR = 1.34, CI = 1.10-1.63), and Behavioral  
155 Syndromes Associated with Physiological Disturbances (OR = 1.18, CI = 1.02-1.35). Effect sizes  
156 and confidence intervals for all ACE count and score coefficients are visualized in Figure 1A.  
157

Table 4. Associations between ACE counts and neuropsychiatric outcomes. Threshold Risk Model = 1, 2, 3,  $\geq 4$  exposures; Cumulative Score Risk Model = Weighted Score.

| <b>Diagnosis</b>                                | <b>Number of ACEs</b> | <b>OR (95 % CI)</b>  |
|-------------------------------------------------|-----------------------|----------------------|
| <b>Mood Disorders</b>                           | 1                     | 1.39 (0.90, 2.15)    |
|                                                 | 2                     | 1.57 (0.98, 2.51)    |
|                                                 | 3                     | 1.14 (0.67, 1.93)    |
|                                                 | $\geq 4$              | 1.69 (1.19, 2.41)**  |
|                                                 | Weighted Score (0-10) | 1.26 (1.13, 1.40)*** |
| <b>Intellectual and Developmental Disorders</b> | 1                     | 1.16 (0.90, 1.50)    |
|                                                 | 2                     | 1.11 (0.82, 1.51)    |
|                                                 | 3                     | 1.05 (0.76, 1.44)    |
|                                                 | $\geq 4$              | 1.04 (0.84, 1.28)    |
|                                                 | Weighted Score (0-10) | 1.01 (0.93, 1.09)    |
| <b>Anxiety Disorders</b>                        | 1                     | 0.99 (0.77, 1.28)    |
|                                                 | 2                     | 1.60 (1.18, 2.17)**  |
|                                                 | 3                     | 1.80 (1.30, 2.48)*** |
|                                                 | $\geq 4$              | 3.48 (2.79, 4.34)*** |
|                                                 | Weighted Score (0-10) | 1.93 (1.76, 2.12)*** |
| <b>Substance Use Disorders</b>                  | 1                     | 0.61 (0.30, 1.24)    |
|                                                 | 2                     | 0.86 (0.42, 1.76)    |

|                                                                        |                       |                      |
|------------------------------------------------------------------------|-----------------------|----------------------|
|                                                                        | 3                     | 0.91 (0.43, 1.93)    |
|                                                                        | ≥4                    | 0.88 (0.53, 1.46)    |
|                                                                        | <hr/>                 |                      |
|                                                                        | Weighted Score (0-10) | 0.92 (0.77, 1.11)    |
| <b>Behavioral and Emotional Disorders</b>                              | 1                     | 0.88 (0.67, 1.15)    |
|                                                                        | 2                     | 1.63 (1.19, 2.23)**  |
|                                                                        | 3                     | 1.46 (1.05, 2.03)*   |
|                                                                        | ≥4                    | 1.83 (1.47, 2.28)*** |
|                                                                        | <hr/>                 |                      |
|                                                                        | Weighted Score (0-10) | 1.33 (1.23, 1.44)*** |
| <b>Personality Disorders</b>                                           | 1                     | 0.85 (0.37, 1.96)    |
|                                                                        | 2                     | 1.70 (0.77, 3.77)    |
|                                                                        | 3                     | 1.23 (0.50, 3.05)    |
|                                                                        | ≥4                    | 1.42 (0.76, 2.65)    |
|                                                                        | <hr/>                 |                      |
|                                                                        | Weighted Score (0-10) | 1.34 (1.10, 1.63)**  |
| <b>Behavioral Syndromes Associated with Physiological Disturbances</b> | 1                     | 0.89 (0.52, 1.52)    |
|                                                                        | 2                     | 1.33 (0.76, 2.35)    |
|                                                                        | 3                     | 0.82 (0.42, 1.63)    |
|                                                                        | ≥4                    | 1.46 (0.97, 2.19)    |
|                                                                        | <hr/>                 |                      |
|                                                                        | Weighted Score (0-10) | 1.18 (1.02, 1.35)*   |

*Note.* ACEs = adverse childhood experiences. OR = odds ratio. CI = 95%

confidence interval. 15 ACEs were analyzed for assessing counts and scores. Multivariate regressions controlled for sex and age. \* $p < .05$ , \*\* $p < .01$ , \*\*\* $p < .001$ .

158  
 159 Results in Table 5 are from a series of logistic regressions associating individual types of ACEs  
 160 with neuropsychiatric outcomes. Across diagnoses, individual ACEs had substantial and  
 161 significant associations with increased risk of psychiatric outcomes. For visualization and  
 162 comparison, model coefficients were grouped into abuse and neglect (Figure 1B), care and  
 163 family background (Figure 1C), and household history (Figure 1D) categories.  
 164

Table 5. Associations between ACE types and neuropsychiatric outcomes

|                   | <b>Mood Disorders</b> | <b>Intellectual and Developmental Disorders</b> | <b>Anxiety Disorder</b> | <b>Substance Use Disorders</b> | <b>Behavioral and Emotional Disorders</b> | <b>Personality Disorders</b> | <b>Behavioral Syndromes Associated with Physiological Disturbances</b> |
|-------------------|-----------------------|-------------------------------------------------|-------------------------|--------------------------------|-------------------------------------------|------------------------------|------------------------------------------------------------------------|
| Emotional abuse   | 1.29 (1.01, 1.63)*    | 0.90 (0.75, 1.08)                               | 2.21 (1.81, 2.69)***    | 0.54 (0.35, 0.85)**            | 1.34 (1.11, 1.61)**                       | 1.49 (0.98, 2.26)            | 1.13 (0.82, 1.55)                                                      |
| Physical abuse    | 1.50 (1.19, 1.88)***  | 1.02 (0.86, 1.21)                               | 2.62 (2.17, 3.17)***    | 0.77 (0.52, 1.15)              | 1.41 (1.19, 1.68)***                      | 1.33 (0.88, 2.00)            | 1.19 (0.88, 1.61)                                                      |
| Sexual abuse      | 2.08 (1.62, 2.68)***  | 1.26 (1.02, 1.55)*                              | 2.39 (1.89, 3.03)***    | 1.13 (0.74, 1.75)              | 1.39 (1.13, 1.73)**                       | 1.65 (1.04, 2.60)*           | 1.53 (1.09, 2.15)*                                                     |
| Abuse unspecified | 0.81 (0.50, 1.32)     | 1.09 (0.77, 1.54)                               | 1.15 (0.80, 1.64)       | 0.85 (0.39, 1.88)              | 1.15 (0.81, 1.63)                         | 1.75 (0.89, 3.47)            | 1.45 (0.84, 2.49)                                                      |
| Physical neglect  | 0.93 (0.75, 1.17)     | 1.04 (0.90, 1.22)                               | 1.61 (1.38, 1.89)***    | 0.53 (0.36, 0.78)**            | 0.97 (0.82, 1.13)                         | 0.77 (0.51, 1.16)            | 0.89 (0.67, 1.18)                                                      |

|                                           |                         |                      |                            |                        |                         |                         |                         |
|-------------------------------------------|-------------------------|----------------------|----------------------------|------------------------|-------------------------|-------------------------|-------------------------|
| Neglect<br>unspecified                    | 1.07 (0.84,<br>1.37)    | 1.09 (0.91,<br>1.29) | 1.46<br>(1.22,<br>1.76)*** | 1.20 (0.81,<br>1.77)   | 1.51 (1.26,<br>1.81)*** | 1.12 (0.72,<br>1.73)    | 1.19 (0.87,<br>1.62)    |
| Caregiver<br>treated<br>violently         | 1.25 (0.99,<br>1.57)    | 1.03 (0.87,<br>1.21) | 2.80<br>(2.32,<br>3.38)*** | 0.99 (0.67,<br>1.45)   | 1.48 (1.25,<br>1.76)*** | 1.43 (0.95,<br>2.15)    | 1.41 (1.06,<br>1.89)*   |
| Family<br>violence                        | 2.12 (1.59,<br>2.81)*** | 1.01 (0.80,<br>1.27) | 2.35<br>(1.79,<br>3.08)*** | 1.22 (0.75,<br>1.99)   | 1.65 (1.29,<br>2.10)*** | 2.54 (1.61,<br>3.99)*** | 1.10 (0.73,<br>1.66)    |
| Substance<br>abuse in<br>the<br>household | 1.07 (0.86,<br>1.33)    | 0.93 (0.79,<br>1.08) | 2.27<br>(1.93,<br>2.66)*** | 1.07 (0.75,<br>1.52)   | 1.41 (1.21,<br>1.65)*** | 1.13 (0.76,<br>1.68)    | 1.14 (0.86,<br>1.51)    |
| Mental<br>illness in<br>the<br>household  | 1.28 (1.03,<br>1.59)*   | 0.98 (0.84,<br>1.14) | 2.08<br>(1.77,<br>2.44)*** | 0.88 (0.61,<br>1.25)   | 1.65 (1.41,<br>1.93)*** | 1.34 (0.90,<br>1.99)    | 1.22 (0.92,<br>1.61)    |
| Incarcerate<br>d<br>household<br>member   | 1.32 (1.01,<br>1.72)*   | 0.89 (0.72,<br>1.09) | 2.04<br>(1.63,<br>2.55)*** | 0.77 (0.47,<br>1.26)   | 1.32 (1.07,<br>1.63)**  | 1.68 (1.07,<br>2.63)*   | 0.95 (0.65,<br>1.38)    |
| Parental<br>divorce<br>separation         | 0.99 (0.76,<br>1.29)    | 0.91 (0.75,<br>1.11) | 1.77<br>(1.43,<br>2.18)*** | 0.59 (0.37,<br>0.95)*  | 1.20 (0.98,<br>1.47)    | 0.79 (0.48,<br>1.31)    | 0.95 (0.66,<br>1.35)    |
| Caregiver<br>Disability<br>Death          | 1.07 (0.82,<br>1.40)    | 0.97 (0.80,<br>1.18) | 1.31<br>(1.07,<br>1.61)**  | 0.92 (0.59,<br>1.43)   | 1.02 (0.84,<br>1.25)    | 1.02 (0.62,<br>1.65)    | 1.06 (0.75,<br>1.51)    |
| Housing<br>instability                    | 1.36 (1.03,<br>1.79)*   | 1.15 (0.93,<br>1.41) | 3.32<br>(2.58,<br>4.28)*** | 1.04 (0.65,<br>1.67)   | 1.79 (1.45,<br>2.21)*** | 1.96 (1.25,<br>3.05)**  | 1.37 (0.97,<br>1.94)    |
| Communit<br>y violence                    | 2.57 (2.01,<br>3.28)*** | 1.15 (0.93,<br>1.41) | 2.88<br>(2.26,<br>3.67)*** | 1.84 (1.25,<br>2.72)** | 2.33 (1.87,<br>2.91)*** | 2.60 (1.71,<br>3.95)*** | 2.21 (1.60,<br>3.05)*** |

*Note.* ACEs = adverse childhood experiences. Each cell shows the odds ratio and 95% confidence interval for the corresponding coefficient. Multivariate regressions controlled for sex and age. \* $p < .05$ , \*\* $p < .01$ , \*\*\* $p < .001$ .

166 In Figure 1, these plots highlight predictors across diagnostic outcomes and reveal diagnosis-  
 167 specific patterns in effect direction and magnitude.

168

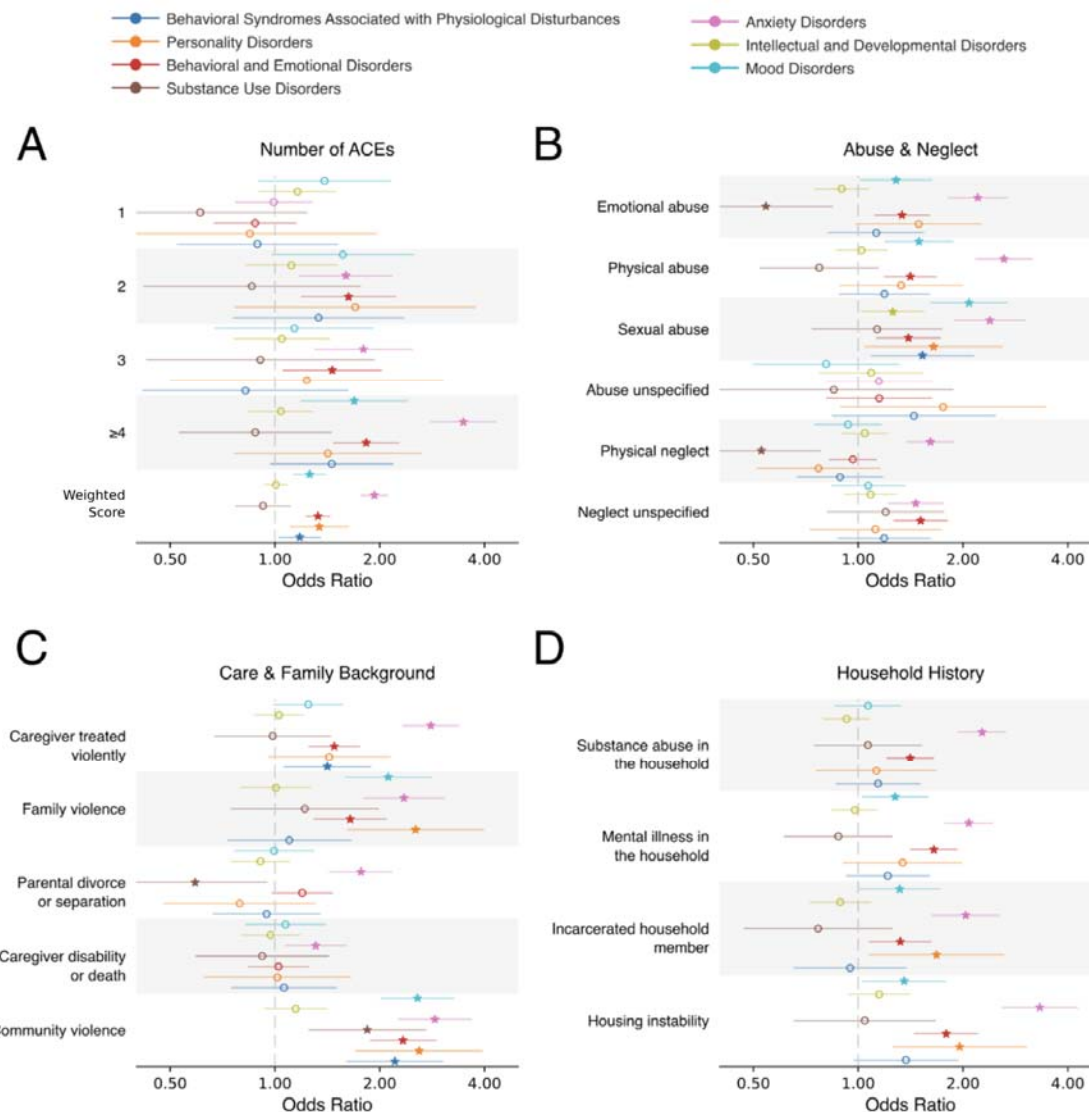

169

170 **Figure 1:** Forest plot of marginal effects of ACE counts and categories on psychiatric  
 171 indications. Each panel shows estimated effects and 95% confidence intervals for ACE count and  
 172 categories across seven diagnostic outcomes. Points indicate mean parameter estimates for odds  
 173 ratios, and horizontal lines denote corresponding confidence intervals. Significant predictors are  
 174 indicated by star markers. Outcomes for each ACE feature are grouped by row. Panels  
 175 correspond to different groupings of ACE features (**A** - Number of ACEs, **B** - ACEs related to  
 176 abuse & neglect, **C** - ACEs related to care and family background, and **D** - ACEs related to  
 177 personal and household history). For the ACE score, the odds ratio corresponds to a one standard  
 178 deviation increase.

179  
180 Results in Table 6 are from a series of logistic regressions associating individual elements of  
181 patient personal history data with neuropsychiatric outcomes. All personal history categories  
182 were strongly associated with increased risk of receiving psychiatric diagnoses. Personal history  
183 of self-injurious behavior (SIB) was significantly associated with every diagnostic category.  
184 Effect sizes and CIs for all personal history coefficients are visualized in Figure 2.  
185

---

Table 6. Associations between patient personal history and neuropsychiatric outcomes.  
Individual Risk Model.

---

| <b>Diagnosis</b>                                | <b>Personal History Type</b>                             | <b>OR (95 % CI)</b>  |
|-------------------------------------------------|----------------------------------------------------------|----------------------|
| <b>Mood Disorders</b>                           | Personal history of being arrested detained incarcerated | 4.34 (2.81, 6.69)*** |
|                                                 | Personal history of suicidal ideation or attempt         | 5.69 (4.20, 7.70)*** |
|                                                 | Personal history of self injurious behavior              | 3.35 (2.63, 4.27)*** |
|                                                 | Personal history of substance use                        | 2.86 (1.70, 4.80)*** |
|                                                 | Personal history of violent behavior                     | 2.37 (1.73, 3.24)*** |
| <b>Intellectual and Developmental Disorders</b> | Personal history of being arrested detained incarcerated | 1.16 (0.77, 1.75)    |
|                                                 | Personal history of suicidal ideation or attempt         | 1.21 (0.91, 1.60)    |
|                                                 | Personal history of self injurious behavior              | 1.56 (1.28, 1.90)*** |
|                                                 | Personal history of substance use                        | 1.30 (0.80, 2.13)    |

---

---

|                                           |                                                          |                       |
|-------------------------------------------|----------------------------------------------------------|-----------------------|
|                                           | Personal history of violent behavior                     | 1.11 (0.84, 1.45)     |
| <b>Anxiety Disorders</b>                  | Personal history of being arrested detained incarcerated | 2.34 (1.46, 3.75)***  |
|                                           | Personal history of suicidal ideation or attempt         | 3.22 (2.30, 4.50)***  |
|                                           | Personal history of self injurious behavior              | 2.27 (1.82, 2.82)***  |
|                                           | Personal history of substance use                        | 2.04 (1.18, 3.53)*    |
|                                           | Personal history of violent behavior                     | 1.69 (1.26, 2.27)***  |
| <b>Substance Use Disorders</b>            | Personal history of being arrested detained incarcerated | 3.17 (1.85, 5.42)***  |
|                                           | Personal history of suicidal ideation or attempt         | 2.55 (1.64, 3.96)***  |
|                                           | Personal history of self injurious behavior              | 1.77 (1.20, 2.61)**   |
|                                           | Personal history of substance use                        | 6.34 (3.52, 11.39)*** |
|                                           | Personal history of violent behavior                     | 1.47 (0.88, 2.44)     |
| <b>Behavioral and Emotional Disorders</b> | Personal history of being arrested detained incarcerated | 4.00 (2.30, 6.95)***  |
|                                           | Personal history of suicidal ideation or attempt         | 2.74 (1.99, 3.77)***  |
|                                           | Personal history of self injurious behavior              | 2.04 (1.67, 2.50)***  |
|                                           | Personal history of substance use                        | 2.03 (1.13, 3.65)*    |

---

---

|                                                                        |                                                          |                      |
|------------------------------------------------------------------------|----------------------------------------------------------|----------------------|
|                                                                        | Personal history of violent behavior                     | 2.96 (2.18, 4.02)*** |
| <b>Personality Disorders</b>                                           | Personal history of being arrested detained incarcerated | 4.11 (2.28, 7.43)*** |
|                                                                        | Personal history of suicidal ideation or attempt         | 3.21 (1.95, 5.28)*** |
|                                                                        | Personal history of self injurious behavior              | 2.50 (1.65, 3.77)*** |
|                                                                        | Personal history of substance use                        | 1.65 (0.74, 3.64)    |
|                                                                        | Personal history of violent behavior                     | 3.06 (1.90, 4.92)*** |
| <b>Behavioral Syndromes Associated with Physiological Disturbances</b> | Personal history of being arrested detained incarcerated | 1.57 (0.87, 2.87)    |
|                                                                        | Personal history of suicidal ideation or attempt         | 2.21 (1.46, 3.36)*** |
|                                                                        | Personal history of self injurious behavior              | 1.88 (1.38, 2.56)*** |
|                                                                        | Personal history of substance use                        | 2.53 (1.33, 4.79)**  |
|                                                                        | Personal history of violent behavior                     | 1.24 (0.79, 1.95)    |

---

*Note.* OR = odds ratio. CI = 95% confidence interval. Multivariate regressions controlled for sex and age. \* $p < .05$ , \*\* $p < .01$ , \*\*\* $p < .001$ .

---

186

187

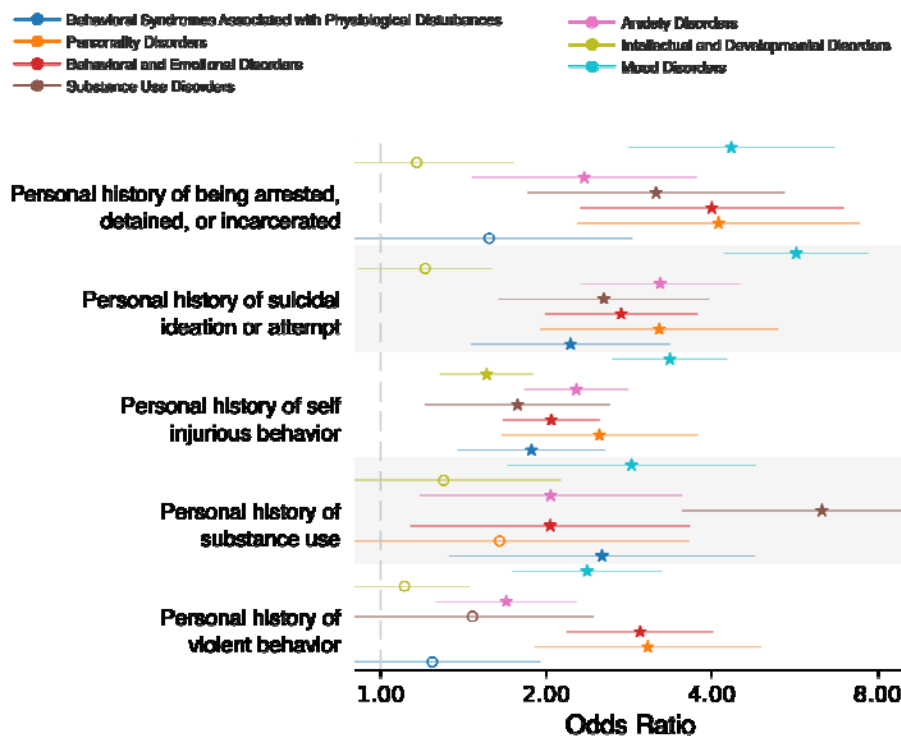

188

189 **Figure 2:** Forest plot of marginal effects of personal history categories on psychiatric and  
190 neurological indications. Each panel shows estimated effects and 95% confidence intervals for  
191 personal history categories across 7 diagnostic outcomes. Points indicate mean parameter  
192 estimates for odds ratios, and horizontal lines denote corresponding confidence intervals.  
193 Significant predictors are indicated by star markers. Outcomes for each personal history feature  
194 are grouped by row.

195

### Discussion

196 This study examined the relationship between formal psychiatric diagnoses and ACEs across  
197 multiple risk modeling approaches: threshold (dose-dependent), cumulative, and individual. This  
198 is the first known study to compare these frameworks to explore psychiatric outcomes among  
199 individuals recently adopted and/or currently in foster care who experienced ACEs. Our findings  
200 provide a significant contribution to current gaps in ACE research by utilizing a modeling  
201 approach for ACE count, score, and type, allowing researchers and clinicians to focus on ACE-  
202 specific risks between adversity and distinct psychiatric diagnoses.

203

#### **Threshold, dose-dependent**

204 Previous studies establish a strong association between ACE count and increased odds of

205 anxiety, depressive, and behavioral disorders.<sup>5</sup> In our sample, ACE count showed a dose-  
206 dependent threshold pattern, with higher ACE counts associated with increased odds of Mood  
207 Disorders (F30–F39), Anxiety Disorders (F40–F48), and Behavioral and Emotional Disorders  
208 (F90–F98).

209  
210 Mood disorders in childhood can disrupt development and are linked to elevated suicide risk.<sup>7</sup>  
211 Consistent with prior work, our findings suggest that risk for Mood Disorders was most apparent  
212 at  $\geq 4$  ACEs. This aligns with previous evidence that higher ACE burden is associated with  
213 depression-related outcomes,<sup>9</sup> and with findings that foster care–related adversities can be  
214 associated with depression risk.<sup>14</sup> Given the substantial public health burden of depression,  
215 clarifying how adversity relates to clinically diagnosed mood disorders in high-risk youth  
216 remains important.

217  
218 Anxiety disorders are common, often begin early, and may become chronic or relapsing.<sup>7</sup> In our  
219 sample, increasing ACE counts were associated with higher odds of Anxiety Disorders,  
220 consistent with evidence that high ACE exposure is linked to substantially elevated anxiety risk  
221 in childhood.<sup>15</sup> Finally, our threshold findings for Behavioral and Emotional Disorders are  
222 consistent with elevated rates of internalizing and externalizing disorders among youth in child  
223 welfare settings.<sup>16</sup> Overall, greater childhood adversity was associated with higher risk across  
224 these psychiatric diagnostic domains.

### 225 **Cumulative ACE score**

226 Cumulative weighted ACE scores have been consistently associated with poorer psychiatric  
227 outcomes.<sup>17</sup> In our sample, higher cumulative ACE score was associated with increased odds

228 across multiple diagnostic domains, including Mood Disorders, Anxiety Disorders, Behavioral  
229 and Emotional Disorders, Personality Disorders, and Behavioral Syndromes Associated with  
230 Physiological Disturbances. These findings align with prior evidence linking higher ACE burden  
231 to mood disorders and depression/bipolar outcomes,<sup>17</sup> and to anxiety symptoms and diagnosis.<sup>7</sup>  
232 Behavioral and Emotional Disorders also showed a graded association with cumulative score,  
233 consistent with elevated behavioral and emotional challenges among foster care youth with  
234 higher adversity exposure.<sup>18</sup> Emerging longitudinal evidence further supports links between  
235 ACE exposure and later personality pathology, which is consistent with our observed association  
236 with the Personality Disorder domain. Finally, higher cumulative weighted ACE score was  
237 associated with Behavioral Syndromes Associated with Physiological Disturbances (e.g.,  
238 sleep/eating disorders), consistent with evidence that adversity in foster/adopted populations is  
239 linked to sleep disturbances and related behavioral sequelae.<sup>19</sup>

#### 240 **Individual**

241 Individual risk modeling proposes that specific ACEs confer risk for the development of poor  
242 psychiatric outcomes. Our findings support individual risks for specific ACEs across several  
243 diagnosis profiles, where forms of violence and abuse had substantial impacts across almost all  
244 neuropsychiatric outcomes. Diagnosis domains of Anxiety Disorders, Behavioral and Emotional  
245 Disorders, and Mood Disorders were most commonly significant across ACE type, where all but  
246 one ACE type illustrated significant increased odds for the Anxiety Disorders diagnosis domain.

#### 247 **Emotional abuse**

248 Emotional abuse was associated with increased odds of Mood, Anxiety, and  
249 Behavioral/Emotional Disorders, consistent with prior findings linking emotional abuse to mood

250 disorder diagnoses.<sup>4</sup> Emotional abuse was also associated with decreased odds of Substance Use

251 Disorders.

### 252 **Physical abuse**

253 Physical abuse was associated with increased odds of Mood, Anxiety, and Behavioral/Emotional

254 Disorders, aligning with evidence linking physical abuse to depressive, anxiety, and

255 behavioral/conduct outcomes.<sup>4</sup>

### 256 **Sexual abuse**

257 Sexual abuse was associated with increased odds across most diagnostic domains, consistent

258 with reports of strong associations with PTSD/anxiety and internalizing symptoms.<sup>12</sup>

### 259 **Physical neglect**

260 Physical neglect was associated with increased odds of Anxiety Disorders and decreased odds of

261 Substance Use Disorders; prior work has linked neglect to anxiety, depression, and PTSD

262 symptoms.<sup>20</sup> The inverse association with Substance Use Disorders may reflect differences

263 between clinician-diagnosed substance use disorders versus broader substance-use behaviors.

### 264 **Neglect unspecified, (e.g. emotional, psychological, medical neglect)**

265 Neglect (unspecified) was associated with increased odds of Anxiety Disorders and

266 Behavioral/Emotional Disorders, consistent with evidence linking neglect to emotional and

267 behavioral challenges.<sup>21</sup>

### 268 **Caregiver treated violently**

269 Witnessing a caregiver treated violently was associated with increased odds of Anxiety,

270 Behavioral/Emotional Disorders, and Behavioral Syndromes Associated with Physiological

271 Disturbances, consistent with prior work in foster care populations,<sup>22</sup> and anxiety-related  
272 findings in maternal battery.<sup>4</sup>

### 273 **Family violence**

274 Family violence was associated with increased odds of Mood, Anxiety, Behavioral/Emotional,  
275 and Personality Disorders; prior work suggests family violence may disrupt attachment and  
276 socioemotional development, which may contribute to later personality pathology.<sup>23</sup>

### 277 **Substance abuse in household**

278 Household substance use was associated with three times the likelihood for Anxiety Disorders  
279 and Behavioral/Emotional Disorders, consistent with prior evidence linking household substance  
280 problems to internalizing and behavioral difficulties.<sup>24</sup>

### 281 **Mental illness in the household**

282 Household mental illness was associated with increased odds of Mood, Anxiety, and  
283 Behavioral/Emotional Disorders, consistent with prior studies.<sup>3</sup>

### 284 **Incarcerated household member**

285 Incarceration exposure was associated with increased odds of Mood, Anxiety,  
286 Behavioral/Emotional, and Personality Disorders, aligning with evidence linking household  
287 incarceration to later depressive/anxiety/stress-related diagnoses.<sup>25</sup>

### 288 **Housing Instability**

289 Housing instability was associated with increased odds across similar diagnostic domains  
290 including internalizing behaviors, depression, anxiety, PTSD, and increased risk of externalizing  
291 behaviors that can escalate to later behavioral, emotional, and personality disorders.<sup>26</sup>

### 292 **Parental divorce separation**

293 Parental divorce or separation held significance for increased odds of Anxiety Disorders and  
294 decreased odds in Substance Use Disorders. Similar to findings in Bohman et al (2017) where  
295 individuals that experienced parental divorce or separation had a higher likelihood of anxiety  
296 disorders into adulthood compared to non exposed individuals.<sup>27</sup>

### 297 **Caregiver Disability Death**

298 Caregiver disability/death was associated with increased odds of Anxiety Disorders, consistent  
299 with evidence linking caregiver loss/disruption to internalizing outcomes.<sup>22</sup>

### 300 **Community violence**

301 Studies show exposure to violent adverse events can dramatically impact an individual's  
302 internalizing and externalizing behavior regulation.<sup>28</sup> In contrast, our findings show that  
303 community violence was significant for increased odds in all diagnosis domains besides  
304 Intellectual and Developmental Disorders. Community violence is not commonly explored in  
305 current ACE research, but similar to family violence, it can impact how an individual navigates  
306 personal and community relationships, which supports our findings for this ACE across almost  
307 all measured diagnosis domains.

308

309 Overall, ACE type adds clinically useful specificity beyond ACE count, highlighting especially  
310 strong vulnerability associated with abuse and violence exposures.

### 311 Personal History

312 Personal history categories were associated with increased risk of receiving a diagnosis across  
313 psychiatric domains. Across all personal history categories, we saw strong significance for  
314 domains of Mood Disorders, Anxiety Disorders, and Behavioral and Emotional Disorders.

315 **Personal history of arrested, detained, or incarcerated**

316 Personal history of incarceration, detainment, or arrest refers to individuals placed in detention or  
317 involuntary confinement in police, emergency, or psychiatric inpatient settings. Prior research  
318 shows that foster care placement is associated with later adult criminal justice involvement and  
319 adverse psychiatric outcomes.<sup>29</sup> Our findings align with this literature, demonstrating significant  
320 associations with Mood, Anxiety, Substance Use, Behavioral and Emotional, and Personality  
321 Disorders. Youth involved in the justice system are disproportionately affected by health  
322 conditions: 60-70% of detained or incarcerated adolescents meet criteria for at least one  
323 psychiatric disorder, compared to approximately 20% in the general population.<sup>30</sup> Moreover, 50-  
324 75% of detained youth later enter the adult criminal justice system, and studies found that in  
325 2014 only 43% of juvenile detention centers provided therapeutic services, potentially  
326 compounding long-term risk.<sup>30</sup> Together, these findings highlight significant mental health risks  
327 associated with early justice involvement.

328 **Personal history of being suicidal ideation or attempt**

329 Personal history of suicide attempt or suicidal ideation was significantly associated with Mood  
330 Disorders, Anxiety Disorders, Substance Use Disorders, Behavioral and Emotional Disorders,  
331 Personality Disorders, and Behavioral Syndromes Associated with Physiological Disturbances,  
332 coinciding with previous research linking these disorders to suicide.<sup>31</sup>

333 **Personal history of self-injurious behavior**

334 SIB was significantly associated with increased odds across all diagnostic domains in this study.  
335 Interestingly, SIB was the only cluster in our study to be significantly linked to Intellectual and  
336 Developmental Disorders, which aligns with previous findings that those with intellectual

337 disabilities were almost five times more likely to engage in SIB than the general population.<sup>32</sup>

### 338 **Personal history of substance use**

339 Personal history of substance use is confirmed by individuals through self-report or a toxicology  
340 screening before their first AMC appointment. This category was found to be significant with  
341 Mood Disorders, Anxiety Disorders, Substance Use Disorders, Behavioral and Emotional  
342 Disorders, and Behavioral Syndromes Associated with Physiological Disturbances, which is  
343 supported by previous research findings linking substance use and its severity with mental health  
344 disorders.<sup>33</sup> This, as well as findings linking youth substance use with a mental health diagnosis,  
345 provides evidence that the presence of mental health disorders can exacerbate substance use.<sup>34</sup>

### 346 **Personal history of violent behavior**

347 This category was found to be significantly associated with Mood Disorders, Anxiety Disorders,  
348 Behavioral and Emotional Disorders, and Personality Disorders, which is supported by previous  
349 findings.<sup>35</sup> For individuals in foster care, bullying also appears to be much more common, with a  
350 prevalence ranging from 55-73% depending on age, race/ethnicity, and gender.<sup>36</sup> These acts of  
351 violence and bullying can have cascading negative effects in the communities or family units in  
352 which they occur.

353  
354 While disorders like anxiety, depression, Attention-Deficit/Hyperactivity Disorder (ADHD),  
355 Post-Traumatic Stress Disorder (PTSD), and oppositional defiant disorder are implicated in all  
356 personal history findings, it is uncertain if they are predictors of the behavior described or if the  
357 affected individual may have difficulty engaging with programs that reduce these behaviors,  
358 showcasing the necessity for timely intervention.

### 359 **Conclusion**

360 ACEs during critical adolescent neurodevelopment may be associated with heightened  
361 vulnerability among youth with foster care/adoption histories, contributing to impairments in  
362 social, emotional, and behavioral functioning that often present as internalizing (depression,  
363 anxiety) and externalizing symptoms (disruptive behavior, aggression).<sup>13</sup> Timely identification  
364 of elevated ACE exposure is essential to enable early, trauma-focused interventions and tailored  
365 supports for social, emotional, and behavioral challenges in this population. Considering high-  
366 risk subgroups (e.g., adolescents in foster care) may further inform targeted prevention strategies.

367 Our study strengthens the evidence base by assessing ACE count, score, and type in relation to  
368 psychiatric diagnoses. Comparing cumulative, threshold, and individual risk models provides  
369 ACE-specific estimates of psychiatric risk and clarifies how adversities cluster across diagnostic  
370 categories. Additional strengths include a large UMN-AMC sample with standardized ACE data  
371 and psychiatric diagnoses, with adjustment for sex and age at visit. Future work should examine  
372 synergistic effects among commonly co-occurring ACEs.

373 In conclusion, ACE exposure was associated with increased odds across multiple psychiatric  
374 diagnostic domains. These findings support both categorical and continuous ACE modeling and  
375 underscore the importance of early, trauma-informed prevention and intervention for foster care  
376 and adopted individuals.

### 377 Limitations

378  
379 ACE data from the UMN-AMC come from first-person (e.g., biological parent report) and  
380 secondary (foster families, kinship caregivers, social workers) sources that confirm or describe  
381 exposure. Because secondary sources are limited, ACE exposure may be underreported. ACEs

382 also vary in frequency, duration, intensity, and individual impact. For community and family  
383 violence variables, patient-perpetrated violence was prioritized; some youth who perpetrated  
384 violence may also have experienced violence. Future research should incorporate greater ACE  
385 dimensionality to clarify associations with psychiatric disorders. Many families seek UMN-  
386 AMC evaluations to access educational and disability resources; thus, youth with existing  
387 behavioral or health concerns may be more likely to present, potentially inflating psychiatric  
388 outcome rates. The Substance Use Disorder (SUD) diagnostic domain saw inverse odds for the  
389 ACE types of emotional abuse, physical abuse, and parental separation, which could be  
390 explained by variation in substance use and formal SUD diagnosis, age and timing of SUD  
391 development, and possible protective barriers like increased engagement in services and  
392 monitoring that could reduce progression to diagnosable SUDs. Future studies with age-matched  
393 controls are needed to improve generalizability.

#### 394 **Future Directions**

395 As our study focused on adversity and negative mental health outcomes, examining how  
396 protective factors of individuals with ACE history alongside resilience pathways could build on  
397 our findings. Additional exploration of detailed ACE variables incorporating domains of SES  
398 background, exposure and or perpetration of violence may provide additional clarity between  
399 specific adversities and psychiatric disorders. Lastly, as our study population consisted of  
400 individuals commonly located in the MN metro, additional research corroborating these models  
401 using different study populations outside of MN would support our findings.

#### 402 **Declarations**

403 **Ethics approval and consent to participate**

404 This study was conducted under the oversight of the UMN Institutional Review Board. All  
405 procedures were in compliance with federal regulations, institutional policies, and ethical  
406 guidelines for human research. No informed consent was required for this retrospective chart  
407 review.

#### 408 **Consent for publication**

409 Not applicable

#### 410 **Availability of data and materials**

411 De-identified participant data—including baseline demographics, prenatal exposures, psychiatric  
412 diagnoses, and more, are available for analysis in the [Data Repository for the University of](#)  
413 [Minnesota \(DRUM\)](#). The two de-identified datasets used in this study Building Understanding of  
414 Transitions & Trauma in Early Formative Life Years (BUTTERFLY) and Clinical Outcomes &  
415 Medical Profiles of Children in Adoption & Statecare Settings (COMPASS) can be found at  
416 these respective links: <https://hdl.handle.net/11299/279102>; <https://hdl.handle.net/11299/279103>  
417 This is protected by an attribution noncommercial sharealike 4.0 international license. You must  
418 give appropriate credit, provide a link to the license, and indicate if changes were made. You  
419 may not in any way that suggests the licensor endorses you or your use. You may not use the  
420 material for commercial purposes. If you remix, transform, or build upon the material, you must  
421 distribute your contributions under the same license as the original. You may not apply legal  
422 terms or technological measures that legally restrict others from doing anything the license  
423 permits.

#### 424 **Competing interests**

425 MF reports grants from National Institutes of Health, Food and Drug Administration, and  
426 National Science Foundation. All other authors declare no competing interests.

#### 427 **Funding**

428 This research was supported by the University of Minnesota's Data Science Initiative,  
429 Department of Pediatrics, Masonic Institute for the Developing Brain, Children's Discovery  
430 Fund, and the National Institutes of Health's National Center for Advancing Translational  
431 Sciences, grant UM1TR004405. This funding had no involvement on the study design, analysis,  
432 interpretation, writing, or submission of this manuscript.

#### 433 **Authors' contributions**

434 AR and MF conceived the project. AR secured funding. AR, LC, and SA supervised data  
435 capture, entered data manually, and validated data of enrolled patients. LC and SA provided  
436 access to the dataset. ED-VR, AK, RB, and AR curated the data. EK, MF, and AR supervised  
437 initial data entry and analysis. ED-VR and AH supervised data analysis and led data clustering  
438 and analysis with outcomes, and data visualization. ED-VR and AH analysed data, including  
439 data modelling and statistical analysis. All authors had access to the raw data. ED-VR and LC  
440 wrote the initial draft of the manuscript. LC, SA, CS, SS, and AR wrote the final manuscript. All  
441 the authors reviewed the final version of the manuscript and had full access to all data reported in  
442 the study. ED-VR, AH, AK, and RB verified the data.

#### 443 **Acknowledgements**

444 We thank all the staff of the University of Minnesota, Adoption Medicine Clinic. We would also  
445 like to thank the individuals that helped lay the initial methodological framework for this data, as

446 well as helped with data entry and quality control: Taylor Rawstern, Jada Loleng, Jonathan

447 Lehman, Jade Roghair

#### 448 **List of Abbreviations**

449 Adverse childhood experiences (ACEs)

450 University of Minnesota Adoption Medicine Clinic (UMN-AMC)

451 Electronic Health Records (EHRs)

452 Comprehensive Child Wellness Assessments (CCWA)

453 Best Practices Integrated Informatics Core (BPIC)

454 Self-Injurious Behavior (SIB)

455 Substance Use Disorder (SUD)

#### 456 **References**

457

458 1. Swedo EA, Aslam MV, Dahlberg LL, Niolon PH, Guinn AS, Simon TR, et al.  
459 Prevalence of Adverse Childhood Experiences Among U.S. Adults — Behavioral  
460 Risk Factor Surveillance System, 2011–2020. *MMWR Morb Mortal Wkly Rep.* 2023  
461 Jun 30;72(26):707–15. doi:10.15585/mmwr.mm7226a2

462 2. Walsh D, McCartney G, Smith M, Armour G. Relationship between childhood  
463 socioeconomic position and adverse childhood experiences (ACEs): a systematic  
464 review. *J Epidemiol Community Health.* 2019 Dec;73(12):1087–93.  
465 doi:10.1136/jech-2019-212738

466 3. Merrick MT, Ports KA, Ford DC, Afifi TO, Gershoff ET, Grogan-Kaylor A. Unpacking  
467 the impact of adverse childhood experiences on adult mental health. *Child Abuse  
468 Negl.* 2017 Jul;69:10–9. doi:10.1016/j.chiabu.2017.03.016

469 4. King AR. Childhood adversity links to self-reported mood, anxiety, and stress-related  
470 disorders. *J Affect Disord.* 2021 Sep;292:623–32. doi:10.1016/j.jad.2021.05.112

471 5. Sahle BW, Reavley NJ, Li W, Morgan AJ, Yap MBH, Reupert A, et al. The  
472 association between adverse childhood experiences and common mental disorders  
473 and suicidality: an umbrella review of systematic reviews and meta-analyses. *Eur  
474 Child Adolesc Psychiatry.* 2022 Oct;31(10):1489–99. doi:10.1007/s00787-021-  
475 01745-2

476 6. Merrick MT, Ford DC, Ports KA, Guinn AS, Chen J, Klevens J, et al. Vital Signs:

- 477 Estimated Proportion of Adult Health Problems Attributable to Adverse Childhood  
478 Experiences and Implications for Prevention - 25 States, 2015-2017. *MMWR Morb*  
479 *Mortal Wkly Rep.* 2019 Nov 8;68(44):999–1005. doi:10.15585/mmwr.mm6844e1  
480 PubMed PMID: 31697656; PubMed Central PMCID: PMC6837472.
- 481 7. Elmore AL, Crouch E. The Association of Adverse Childhood Experiences With  
482 Anxiety and Depression for Children and Youth, 8 to 17 Years of Age. *Acad Pediatr.*  
483 2020 Jul;20(5):600–8. doi:10.1016/j.acap.2020.02.012 PubMed PMID: 32092442;  
484 PubMed Central PMCID: PMC7340577.
- 485 8. Webster EM. The Impact of Adverse Childhood Experiences on Health and  
486 Development in Young Children. *Glob Pediatr Health.* 2022;9:2333794X221078708.  
487 doi:10.1177/2333794X221078708 PubMed PMID: 35237713; PubMed Central  
488 PMCID: PMC8882933.
- 489 9. Felitti VJ, Anda RF, Nordenberg D, Williamson DF, Spitz AM, Edwards V, et al.  
490 Relationship of Childhood Abuse and Household Dysfunction to Many of the  
491 Leading Causes of Death in Adults. *Am J Prev Med.* 1998 May;14(4):245–58.  
492 doi:10.1016/S0749-3797(98)00017-8
- 493 10. Lacey RE, Minnis H. Practitioner Review: Twenty years of research with adverse  
494 childhood experience scores – Advantages, disadvantages and applications to  
495 practice. *J Child Psychol Psychiatry.* 2020 Feb;61(2):116–30.  
496 doi:10.1111/jcpp.13135
- 497 11. Henry LM, Gracey K, Shaffer A, Ebert J, Kuhn T, Watson KH, et al. Comparison of  
498 three models of adverse childhood experiences: Associations with child and  
499 adolescent internalizing and externalizing symptoms. *J Abnorm Psychol.* 2021  
500 Jan;130(1):9–25. doi:10.1037/abn0000644 PubMed PMID: 33271039; PubMed  
501 Central PMCID: PMC8687696.
- 502 12. Lee E, Larkin H, Esaki N. Exposure to Community Violence as a New Adverse  
503 Childhood Experience Category: Promising Results and Future Considerations. *Fam*  
504 *Soc J Contemp Soc Serv.* 2017 Jan;98(1):69–78. doi:10.1606/1044-3894.2017.10
- 505 13. Engler AD, Sarpong KO, Van Horne BS, Greeley CS, Keefe RJ. A Systematic  
506 Review of Mental Health Disorders of Children in Foster Care. *Trauma Violence*  
507 *Abuse.* 2022 Jan;23(1):255–64. doi:10.1177/1524838020941197
- 508 14. Desch J, Mansuri F, Tran D, Schwartz SW, Bakour C. The association between  
509 adverse childhood experiences and depression trajectories in the Add Health study.  
510 *Child Abuse Negl.* 2023 Mar;137:106034. doi:10.1016/j.chiabu.2023.106034
- 511 15. Hunt TKA, Slack KS, Berger LM. Adverse childhood experiences and behavioral  
512 problems in middle childhood. *Child Abuse Negl.* 2017 May;67:391–402.  
513 doi:10.1016/j.chiabu.2016.11.005
- 514 16. Moussavi Y, Breivik K, Wergeland GJ, Haugland BSM, Larsen M, Lehmann S.

- 515 Internalizing Symptom Profiles Among Youth in Foster Care: A Comparison Study.  
516 Front Psychiatry. 2021 Aug 16;12:711626. doi:10.3389/fpsy.2021.711626
- 517 17. Park YM, Shekhtman T, Kelsoe JR. Effect of the Type and Number of Adverse  
518 Childhood Experiences and the Timing of Adverse Experiences on Clinical  
519 Outcomes in Individuals with Bipolar Disorder. Brain Sci. 2020 Apr 27;10(5):254.  
520 doi:10.3390/brainsci10050254
- 521 18. Zhou Q, Chew P, Oei A, Chu CM, Ong M, Hoo E. Longitudinal Effects of Cumulative  
522 Adverse Childhood Experiences on Internalizing and Externalizing Problems in  
523 Adolescents in Out-of-Home Care: Emotion Dysregulation as a Mediator. Advers  
524 Resil Sci. 2025 Dec;6(4):413–29. doi:10.1007/s42844-024-00161-0
- 525 19. Hambrick EP, Rubens SL, Brawner TW, Taussig HN. Do sleep problems mediate  
526 the link between adverse childhood experiences and delinquency in preadolescent  
527 children in foster care? J Child Psychol Psychiatry. 2018 Feb;59(2):140–9.  
528 doi:10.1111/jcpp.12802
- 529 20. Haim-Nachum S, Amsalem D, Lazarov A, Seedat S, Neria Y, Zhu X. Childhood  
530 maltreatment and its associations with trauma-related psychopathology:  
531 disentangling two classification approaches. Npj Ment Health Res. 2024 Aug  
532 16;3(1):39. doi:10.1038/s44184-024-00082-x
- 533 21. Hornfeck F, Bovenschen I, Heene S, Zimmermann J, Zwönitzer A, Kindler H.  
534 Emotional and behavior problems in adopted children – The role of early adversities  
535 and adoptive parents' regulation and behavior. Child Abuse Negl. 2019  
536 Dec;98:104221. doi:10.1016/j.chiabu.2019.104221
- 537 22. Turney K, Wildeman C. Adverse childhood experiences among children placed in  
538 and adopted from foster care: Evidence from a nationally representative survey.  
539 Child Abuse Negl. 2017 Feb;64:117–29. doi:10.1016/j.chiabu.2016.12.009
- 540 23. Bunston W, Franich-Ray C, Tatlow S. A Diagnosis of Denial: How Mental Health  
541 Classification Systems Have Struggled to Recognise Family Violence as a Serious  
542 Risk Factor in the Development of Mental Health Issues for Infants, Children,  
543 Adolescents and Adults. Brain Sci. 2017 Oct 17;7(10):133.  
544 doi:10.3390/brainsci7100133
- 545 24. Turney K, Olsen A. Household member substance problems and children's health in  
546 the United States. SSM - Popul Health. 2019 Apr;7:100400.  
547 doi:10.1016/j.ssmph.2019.100400
- 548 25. Gifford EJ, Eldred Kozecke L, Golonka M, Hill SN, Costello EJ, Shanahan L, et al.  
549 Association of Parental Incarceration With Psychiatric and Functional Outcomes of  
550 Young Adults. JAMA Netw Open. 2019 Aug 23;2(8):e1910005.  
551 doi:10.1001/jamanetworkopen.2019.10005
- 552 26. Maguire D, May K, McCormack D, Fosker T. A Systematic Review of the Impact of

- 553 Placement Instability on Emotional and Behavioural Outcomes Among Children in  
554 Foster Care. *J Child Adolesc Trauma*. 2024 Jun;17(2):641–55. doi:10.1007/s40653-  
555 023-00606-1
- 556 27. Bohman H, Låftman SB, Päären A, Jonsson U. Parental separation in childhood as  
557 a risk factor for depression in adulthood: a community-based study of adolescents  
558 screened for depression and followed up after 15 years. *BMC Psychiatry*. 2017  
559 Dec;17(1):117. doi:10.1186/s12888-017-1252-z
- 560 28. Lee H, Kim Y, Terry J. Adverse childhood experiences (ACEs) on mental disorders  
561 in young adulthood: Latent classes and community violence exposure. *Prev Med*.  
562 2020 May;134:106039. doi:10.1016/j.ypmed.2020.106039
- 563 29. DeGue S, Spatz Widom C. Does out-of-home placement mediate the relationship  
564 between child maltreatment and adult criminality? *Child Maltreat*. 2009  
565 Nov;14(4):344–55. doi:10.1177/1077559509332264 PubMed PMID: 19258304.
- 566 30. Duchschere JE, Reznik SJ, Shanholtz CE, O'Hara KL, Gerson N, Beck CJ, et al.  
567 Addressing A Mental Health Intervention Gap in Juvenile Detention: A Pilot Study.  
568 *Evid-Based Pract Child Adolesc Ment Health*. 2023 Apr 3;8(2):236–51.  
569 doi:10.1080/23794925.2022.2042873
- 570 31. Brådvik L. Suicide Risk and Mental Disorders. *Int J Environ Res Public Health*. 2018  
571 Sep 17;15(9):2028. doi:10.3390/ijerph15092028 PubMed PMID: 30227658; PubMed  
572 Central PMCID: PMC6165520.
- 573 32. van den Bogaard KJHM, Nijman HLI, Palmstierna T, Embregts PJCM. Self-Injurious  
574 Behavior in People with Intellectual Disabilities and Co-Occurring Psychopathology  
575 using the Self-Harm Scale: A Pilot Study. *J Dev Phys Disabil*. 2018;30(5):707–22.  
576 doi:10.1007/s10882-018-9614-0 PubMed PMID: 30220833; PubMed Central  
577 PMCID: PMC6132616.
- 578 33. Richert T, Anderberg M, Dahlberg M. Mental health problems among young people  
579 in substance abuse treatment in Sweden. *Subst Abuse Treat Prev Policy*. 2020 Jun  
580 24;15(1):43. doi:10.1186/s13011-020-00282-6 PubMed PMID: 32580732; PubMed  
581 Central PMCID: PMC7315521.
- 582 34. National Institute on Drug Abuse. Common Comorbidities with Substance Use  
583 Disorders Research Report [Internet]. Bethesda (MD): National Institutes on Drug  
584 Abuse (US); 2020 [cited 2026 Feb 23]. Available from:  
585 <http://www.ncbi.nlm.nih.gov/books/NBK571451/> PubMed PMID: 34185444.
- 586 35. Kumpulainen, K. Psychiatric conditions associated with bullying. *Int J Adolesc Med*  
587 *Health*. 2008 Apr;20(2):121–32. doi:10.1515/IJAMH.2008.20.2.121
- 588 36. Miranda A, Rodriguez MC. Are bullying experiences and developmental assets  
589 associated with education outcomes for youth in foster care? *Child Youth Serv Rev*.  
590 2023 Dec;155:107160. doi:10.1016/j.childyouth.2023.107160
